# *Geobacter sulfurreducens* extracellular multiheme cytochrome PgcA facilitates respiration to Fe(III) oxides but not electrodes

Lori Zacharoff<sup>1\*</sup>, Dana Morrone<sup>3</sup>, and Daniel R. Bond<sup>2#</sup>

BioTechnology Institute<sup>1,2</sup>, Department of Biochemistry, Molecular Biology, and Biophysics<sup>1</sup>, and Department of Plant and Microbial Biology<sup>2</sup>, University of Minnesota-Twin Cities, Saint Paul MN 55108; St. Louis College of Pharmacy, St. Louis, Missouri<sup>3</sup>.

**Running Title:** *Geobacter sulfurreducens* PgcA

\*Current address: University of Southern California, 920 Bloom Walk, Los Angeles, CA 90034

**Send all correspondence to:**

Daniel R. Bond  
140 Gortner Laboratory  
1479 Gortner Ave  
St. Paul, MN 55108  
dbond@umn.edu

## 1 **Abstract**

2 Extracellular cytochromes are hypothesized to facilitate the final steps of electron  
3 transfer between the outer membrane of the metal-reducing bacterium *Geobacter*  
4 *sulfurreducens* and solid-phase electron acceptors such as metal oxides and electrode  
5 surfaces during the course of respiration. The triheme c-type cytochrome PgcA exists in  
6 the extracellular space of *G. sulfurreducens*, and is one of many multiheme c-type  
7 cytochromes known to be loosely bound to the bacterial outer surface. Deletion of *pgcA*  
8 using a markerless method resulted in mutants unable to transfer electrons to Fe(III)  
9 and Mn(IV) oxides; yet the same mutants maintained the ability to respire electrode  
10 surfaces and soluble Fe(III) citrate. When expressed and purified from *Shewanella*  
11 *oneidensis*, PgcA demonstrated a primarily alpha helical structure, three bound hemes,  
12 and was processed into a shorter 41 kDa form lacking the lipodomain. Purified PgcA  
13 bound Fe(III) oxides, but not magnetite, and when PgcA was added to cell suspensions  
14 of *G. sulfurreducens*, PgcA accelerated Fe(III) reduction similar to addition of FMN.  
15 Addition of soluble PgcA to  $\Delta pgcA$  mutants also restored Fe(III) reduction. This report  
16 highlights a distinction between proteins involved in extracellular electron transfer to  
17 metal oxides and poised electrodes, and suggests a specific role for PgcA in facilitating  
18 electron transfer at mineral surfaces.

19

20

21

22 Keywords: multiheme cytochromes, repetitive domains, extracellular metal reduction,  
23 *Geobacter*

24

25

## 26 Introduction

27 Dissimilatory metal reducing bacteria such as *Geobacter sulfurreducens* have to  
28 transfer respiratory electrons to extracellular acceptors via direct contact to minerals  
29 such as iron and manganese oxides. These minerals exist as a heterogeneous mixture  
30 of insoluble particles in nature, with a range of redox potentials and surface charges that  
31 change during reduction (Byrne et al., 2011; Coker et al., 2012; Cutting et al., 2009;  
32 Majzlan, 2012; Nealson and Saffarini, 1994). Respiration of such diverse acceptors in  
33 soils and sediments is likely to require continuous modification of the extracellular space  
34 to facilitate interfacial contact. Evidence is accumulating that *Geobacter* strains alter  
35 secretion of polysaccharides (Rollefson et al., 2011), conductive pili (Klimes et al., 2010;  
36 Reguera et al., 2005), and multiheme c-type cytochromes (Ding et al., 2006, 2008;  
37 Mehta et al., 2005; Nevin et al., 2009), depending on environmental conditions.

38  
39 A few *G. sulfurreducens* proteins are known to be secreted beyond the outer membrane  
40 where they could act as loosely bound or mobile mediators to facilitate the final steps of  
41 electron transfer analogous to how secreted redox-active molecules accelerate  
42 reduction by *Shewanella oneidensis* (Lies et al., 2005; Marsili et al., 2008; Von Canstein  
43 et al., 2008), *Geothrix fermentans* (Mehta-Kolte and Bond, 2012; Nevin and Lovley,  
44 2002) and *Geobacter uraniireducens* (Tan et al., 2016). For example, the tetraheme  
45 cytochrome OmcE can be physically sheared from intact Mn(IV) oxide grown cells  
46 (Mehta et al., 2005), the hexaheme cytochrome OmcS complexes with pili during  
47 growth with Fe(III) oxides (Leang et al., 2010), and the octaheme cytochrome OmcZ is  
48 associated with the extracellular matrix of cells grown on electrodes (Inoue et al., 2011).  
49 A more elusive secreted cytochrome was described in 1999 (Lloyd et al., 1999), where  
50 a 41 kDa extracellular hemeprotein enriched from *G. sulfurreducens* supernatants was  
51 found to rapidly adsorb to Fe(III) oxides. However, this protein has not been linked to a  
52 genetic locus.

53  
54 One candidate for this uncharacterized 41 kDa extracellular cytochrome is the c-type  
55 triheme lipocytochrome PgcA (GSU1761). Expression of *pgcA* is driven by a GEMM  
56 (genes for the environment, membranes and motility) riboswitch responsive to the

57 dinucleotide cyclic AMP-GMP (Kellenberger et al., 2015; Nelson et al., 2015). In  
58 proteomic surveys, PgcA is more abundant when insoluble Fe(III) oxides are the  
59 terminal electron acceptor, compared to soluble Fe(III) citrate (Ding et al., 2008).  
60 Expression of *pgcA* also increases during growth with Fe(III) oxide compared to Fe(III)  
61 citrate (Aklujkar et al., 2013). Selection for rapid growth with Fe(III) oxides enriches for  
62 riboswitch mutations that enhance *pgcA* expression, and selection of a *G.*  
63 *sulfurreducens* KN400 pili mutant for improved Fe(III) oxide reduction increased *pgcA*  
64 expression, and led to production of a ~40 kDa extracellular cytochrome identified as  
65 PgcA. As the *pgcA* gene predicts a 57 kDa product, this result suggests processing of  
66 secreted PgcA by cells (Smith et al., 2014; Tremblay et al., 2011; Yi et al., 2009).

67  
68 With a predicted localization as a lipoprotein on the cell surface, detection in a  
69 processed unbound form, and link to metal oxide reducing conditions, PgcA could play  
70 an unrecognized role in the final stages of extracellular electron transfer by *G.*  
71 *sulfurreducens* (Smith et al., 2014; Tremblay et al., 2011; Yi et al., 2009). Here, we  
72 investigated PgcA by creating and complementing markerless *pgcA* ( $\Delta pgcA$ ) deletion  
73 strains, and purifying PgcA from a heterologous host. Mutants lacking *pgcA* were  
74 severely deficient in Fe(III) oxide respiration, but remained unimpaired in growth with  
75 other extracellular acceptors such as electrodes and soluble Fe(III) citrate. We found  
76 heterologous PgcA to exist in two forms: 57 kDa as well as a shorter 41 kDa domain  
77 lacking the predicted lipid attachment site. Purified PgcA bound Fe(III) oxides but not  
78 magnetite, and when added to resting cell suspensions of both wild type and  $\Delta pgcA$   
79 cultures, soluble PgcA accelerated Fe(III) reduction similar to added flavin  
80 mononucleotide. This implicates PgcA-family cytochromes as a class of proteins  
81 specific to metal oxide reduction.

82

83

## 84 **Materials and Methods**

85 *Cell culture and growth assays.* Laboratory stocks of *G. sulfurreducens* PCA (lab strain  
86 resequencing described in (Chan et al., 2015)), and mutants were resuscitated from  
87 laboratory stocks by streaking onto 1.5% agar containing minimal salts medium (NB)  
88 (Chan et al., 2015) with 20 mM acetate and 40 mM fumarate (NBFA), and picking  
89 colonies into liquid medium for each experiment. All *G. sulfurreducens* cultures and  
90 media were prepared anaerobically under 80% N<sub>2</sub>, 20% CO<sub>2</sub> atmosphere.

91  
92 Electrochemical bioreactor experiments contained NB medium with 20 mM acetate and  
93 additional NaCl salts added in place of fumarate. Cultures of *Geobacter* strains grown  
94 with excess acetate, were used as an inoculum as they approached an OD (600 nm) of  
95 0.5. Polished graphite electrodes (1500 grit), with a surface area of 3 cm<sup>2</sup>, were used as  
96 working electrodes. A small piece of platinum wire was used as a counter electrode and  
97 a calomel electrode connected via a Vycor frit salt bridge was used as a reference  
98 electrode. Bioreactors were maintained at a constant 30 °C. Growth with freshly  
99 precipitated insoluble Fe(III) oxide (55 mM), Fe(III) citrate (55 mM) and MnOOH (30  
100 mM) was performed in the same medium without the additional salt and 20 mM acetate  
101 as the electron donor.

102  
103 Fe(III) reduction was measured by monitoring accumulation of Fe(II) by means of a  
104 FerroZine assay. As previously described, (Levar et al., 2014; Rollefson et al., 2009)  
105 100 µL samples were extracted from 10 mL Balch culture tubes and diluted in 1 N  
106 hydrochloric acid until conclusion of the experiment when the FerroZine assay was  
107 performed in 96 well plate format. Mn(IV) reduction was monitored as described in  
108 (Levar et al. 2017).

109  
110 *Biofilm formation.* Cell attachment to surfaces was characterized using a crystal violet,  
111 96 well plate assay as described previously (Rollefson et al., 2009, 2011). Growth  
112 medium contained 30 mM acetate, 40 mM fumarate. Incubation occurred for 72 hours.  
113 Optical density at 600 nm was measured, wells were emptied, and cells bound to the  
114 plate were stained with 0.006% crystal violet for 15 minutes at room temperature.

115 Excess dye was rinsed away with distilled water. 300  $\mu$ L of 100% DMSO was used to  
116 solubilize the dye that remained attached to cells. Microwell plates with Nunclon were  
117 used in this study (Thermo Fisher Scientific).

118  
119 *Strain construction.* *G. sulfurreducens*  $\Delta$ *pgcA* was created using the markerless deletion  
120 method described in previously (Chan et al., 2015, Zacharoff et al., 2016). 1 kB up and  
121 downstream of GSU1761 (*pgcA*) was cloned into pk18mobsacB vector. This plasmid  
122 was mated into *G. sulfurreducens* via *E. coli* strain S17-1. The first round of selection  
123 was performed on (200  $\mu$ g/mL) kanamycin NBFA plates to obtain recombinant cells.  
124 Kanamycin resistant colonies were restreaked and plated on 10% sucrose for a second  
125 round of selection for recombination events that resulted in reversion to wild type or  
126 gene deletion. Colonies from this round of selection were patched onto plates with and  
127 without kanamycin. Colonies sensitive to kanamycin were screened for loss of  
128 GSU1761 using PCR. GSU1761 was also cloned into pRK2-Geo2 (Chan et al., 2015)  
129 backbone for growth complementation testing. This plasmid contains a constitutive  
130 promoter from the *G. sulfurreducens* gene *acpP* (GSU1604). GSU1761 was also cloned  
131 into the pBAD202/D-TOPO<sup>®</sup> (Thermo Fisher Scientific) plasmid backbone which  
132 resulted in an arabinose inducible expression vector containing PgcA fused to a 6X –  
133 histidine tag on the carboxy terminus (pBAD202PgcA).

134  
135 *S. oneidensis* was electroporated with pBAD202PgcA plasmid after passage of the  
136 expression plasmid through a methylation minus *E. coli* K12 ER2925 strain (New  
137 England Biolabs, Ipswich, MA). Transformants were selected on 50  $\mu$ g/mL kanamycin  
138 infused LB plate. *S. oneidensis* was routinely cultured in lysogeny broth (LB) (Becton,  
139 Dickinson & co, Franklin Lakes, NJ). Plasmids and deletion strains were sequence  
140 confirmed via Sanger sequencing at UMGC, University of Minnesota. See Table 1 for  
141 strain designations.

142  
143 *Protein purification.* 10 mL cultures of the PgcA expressing strain of *S. oneidensis* were  
144 used to inoculate 1 liter of LB medium containing 50  $\mu$ g/mL kanamycin. Cells were  
145 incubated at room temperature (25 °C) at slow rotation speed to achieve microaerobic

146 conditions. The use of non-baffled shake flasks also decreased the amount of oxygen in  
147 the medium. The optical densities at 600 nm were monitored until an optical density of  
148 0.5 was achieved. At this time 3 mM (final concentration) of arabinose was added to  
149 induce PgcA expression. 100  $\mu$ M FeCl<sub>3</sub> was also added at this time to increase the  
150 amount of bioavailable iron in the medium. Cells were pelleted 18 hours after induction  
151 at 4,000  $\times$  g. The pellet was washed with 100 mM Tris-HCl, 200 mM NaCl, pH 7.5  
152 buffer. Resuspension and lysis via sonication (50% duty cycle, amplitude of 20%, 2 cm  
153 horn, for 30 minutes) was performed in the same buffer with lysozyme and DNase.  
154 Lysate was centrifuged at 30,000  $\times$  g for 30 minutes. The soluble fraction was loaded on  
155 to a nickel affinity column. Protein was eluted with 300 mM imidazole. Concentrated  
156 eluent was further purified with gel filtration or anion exchange chromatography. Gel  
157 filtration was done using a 45 cm length, 1 cm diameter column filled with Sepharose 6B  
158 (Sigma-Aldrich, St. Louis, MO). A flow rate of 1 mL/min was used during column  
159 equilibration and sample separation. Anion exchange separation was performed using  
160 HiTrap Q HP, 5 mL columns (GE Health Care, Uppsala, Sweden). A flow rate of 5  
161 mL/min was used. Sample was loaded onto column in no salt 100 mM Tris-HCl. A  
162 gradient program was initiated using a mixture of 0.5 M NaCl, 100 mM Tris-HCl and no  
163 salt 100 mM Tris-HCl. Protein sample was monitored throughout purification using  
164 SDS-PAGE gel stained for total protein and for peroxidase activity based heme stain  
165 3,3',5,5' tetramethylbenzidine (TMBZ) (Smith et al., 2015; Thomas et al., 1976).

166

167 *Mass spectrometry.* Protein samples that resulted from nickel affinity purification were  
168 separated on a BisTris, SDS, 12.5% polyacrylamide gel. Bands at 41 kDa and 57 kDa  
169 were excised from the gel. Trypsin digest and LCMS mass spectrometry using Thermo  
170 LTQ were performed on each of the band sizes (Center for Mass Spectrometry and  
171 Proteomics, University of Minnesota). PEAKS Studio software was used to analyze  
172 fragments (BSI Informatics Solutions).

173

174 *Circular dichroism.* Protein sample was dialyzed with 50 mM phosphate, pH 7.5, with  
175 100 mM sodium fluoride to decrease background signal in the ultraviolet region  
176 (Greenfield, 2007). A JASCO-J815 spectropolarimeter was used to acquire circular



177 dichroism spectra in the range of 185 nm to 600 nm. Samples were maintained at room  
178 temperature for the entirety of experimentation. Spectra were analyzed using K2D3  
179 program (Pellegrini, 2015).

180  
181 *Stimulation of Fe(III) oxide reduction by added PgcA.* 96 deep well plates were prepared  
182 with 20 mM Fe(III) oxide medium. Flavin mononucleotide (FMN) (0-200  $\mu$ M), bovine  
183 serum albumin (BSA), horse heart cytochrome c, or purified PgcA (12  $\mu$ M equivalent of  
184 each protein) were added prior to cell addition. 100  $\mu$ L of 0.6 OD (600 nm) cells, either  
185 wild type *G. sulfurreducens*, or  $\Delta$ *pgcA* strain, were mixed into the 1 ml wells. A negative  
186 control lacking cells was also included. Cells were allowed to reduce Fe(III) for 20 h in  
187 an anaerobic chamber with an atmosphere of 20% CO<sub>2</sub>, 75% N<sub>2</sub>, 5% H<sub>2</sub>. A FerroZine  
188 assay was used for Fe(II) quantification, as described above. Preliminary Fe(II)  
189 measurements conducted over 4h intervals verified that reduction was linear over this  
190 short incubation period.

191  
192 *Sequences used for alignment of PgcA homologs.* Sequences used for Figure 6 were  
193 obtained from (Strain, locus, GI number); *Geobacter sulfurreducens*, GSU1761,  
194 GI:637126441: *Geobacter uranirreducens*, Gura\_0706, GI:640548206: *Geobacter*  
195 *bemidjensis*, Gbem\_1881, GI:642767873, *Geobacter sp. FRC-32*, Geob\_3176,  
196 GI:643640481: *Geobacter sp. M21*, GM21\_2329, GI:644869943: *Geobacter brementis*,  
197 K419DRAFT\_01717, GI:2524445678: *Geobacter argillaceus*, Ga0052872\_00704,  
198 GI:2597449491: *Geobacter pickeringii*, Ga0069501\_111509, GI:2633859152:  
199 *Desulfuromonas soudanensis WTL*, Ga0081808\_112930, GI:2637110285: *Geobacter*  
200 *sulfurreducens AM-1*, Ga0098194\_11, GI:2640720749: *Geobacter soli*,  
201 Ga0077628\_111213, GI:2649969705: *Geobacter anodireducens*, Ga0133348\_111806,  
202 GI:2689034555. After preliminary alignment by Clustal, sequences were trimmed to  
203 include only conserved repetitive/heme regions and re-aligned to obtain multifasta files  
204 as input for WebLogo3 using default parameters (Crooks et al, 2004).



## 205 Results

206 *Predicted features of PgcA and related proteins.* The amino acid sequence of *G.*  
207 *sulfurreducens* PgcA predicts three c-type heme binding (CXXCH) motifs separated by  
208 repetitive elements (Figure 1). The amino acids threonine (T) and proline (P) alternate  
209 to form a string of 29 PT<sub>x</sub> repetitions, followed by a heme motif, and a second PT<sub>x</sub>-heme  
210 region (Figure 1). PT<sub>x</sub>-rich tandem repeats are found in many *G. sulfurreducens*  
211 relatives, while PA<sub>x</sub>-dominated repeats are found in strains such as *G. uraniireducens*  
212 and *Desulfuromonas soudanensis*. This general pattern could also be identified using  
213 PTRStalker to detect fuzzy tandem repeats (Pellegrini, 2015; Pellegrini et al., 2012),  
214 which detected many PgcA-like sequences in *Geobacter* genomes, and also predicted  
215 tandem repeats in extracellular cytochromes that did not contain PT<sub>x</sub> or PA<sub>x</sub> domains.

216  
217 The number of hemes within identified PgcA homologs varies. Only one CXXCH motif is  
218 observable in *G. metallireducens*, while six occur in *G. bemidjiensis*. The presence of  
219 PT<sub>x</sub> repeats in the *G. sulfurreducens* sequence was notable, as Lower (Lower et al.,  
220 2008) found that proline in the tripeptide S/T-P-S/T restricts flexibility and positions  
221 serine/threonine hydroxyl groups for hydrogen bonding with metal oxide surfaces.  
222 Hematite association has also been observed near a short threonine-proline-serine  
223 motif near exposed heme groups in the *S. oneidensis* OmcA crystal structure (Edwards  
224 et al., 2012).

225  
226 *Geobacter sulfurreducens* cells lacking *pgcA* are Fe(III) oxide respiration deficient but  
227 capable of Fe(III) citrate and electrode respiration. A markerless mutant lacking *pgcA*  
228 showed no defect in reduction of the soluble electron acceptor Fe(III) citrate, and  
229 expression of *pgcA* via a constitutive promoter in  $\Delta pgcA$  cells also had no effect on  
230 growth (Fig 2A). In contrast, when insoluble metals such as Fe(III) oxide (Figure 2B) or  
231 Mn(IV) oxide were present, reduction was severely impaired in the  $\Delta pgcA$  strain. After  
232 10 days of incubation, wild type *G. sulfurreducens* carrying an empty vector produced  
233 36.3 mM Fe(II), while  $\Delta pgcA$  produced only 9.0 mM Fe(II). Expression of *pgcA* from a  
234 constitutive promoter restored 75% of Fe(III) reduction activity, producing 27.4 mM  
235 Fe(II) in 10 days. A similar defect in Mn(IV) reduction was also observed in  $\Delta pgcA$

236 mutants (data not shown).

237

238 When cultivated using +0.24 V vs. SHE poised graphite electrodes as the electron  
239 acceptor, wild type and  $\Delta pgcA$  cells demonstrated similar doubling times of 5.6 hours  
240 (n=3) vs. 5.5 hours (n=3) (Figure 3A). In addition, wild type and  $\Delta pgcA$  cells reached a  
241 similar current density of 550  $\mu\text{A}/\text{cm}^2$  within 3 days of growth. Complementation of  
242  $\Delta pgcA$  *in trans* also resulted in similar growth. Further evidence that PgcA played no  
243 role at any stage of electron transfer to electrodes was obtained from cyclic voltammetry  
244 scans over a wide (-0.4 V to +0.3 V) potential range, which were similar at all redox  
245 potentials. Similar results were obtained at -0.1 V vs. SHE, consistent with cyclic  
246 voltammetry data (Figure 3B).

247

248 *Geobacter* strains lacking extracellular components can show increased binding to  
249 negatively charged surfaces, which has been correlated with defects in reduction of  
250 substrates. Mutants in the *xap* extracellular polysaccharide synthesis gene cluster show  
251 over 250% increases in attachment to negatively charged surfaces, and are also  
252 defective in binding poised graphite electrodes (Rollefson et al., 2009, 2011). In  
253 contrast, mutants showing 50-75% levels of attachment were not correlated with any  
254 reduction phenotypes. Binding was investigated in  $\Delta pgcA$  cells grown to stationary  
255 phase with fumarate as the electron acceptor, and determined by a crystal violet  
256 attachment assay. Using polystyrene culture plates,  $\Delta pgcA$  bound 79% as well as wild  
257 type, suggesting changes to the outer surface, but consistent with wild type-like  
258 interactions with electrodes.

259 *Biochemical assessment of PgcA.* PgcA was expressed in *Shewanella oneidensis*  
260 under control of an arabinose-inducible promoter under microaerobic conditions, and  
261 successful incorporation of all three predicted hemes were determined by the pyridine  
262 hemochrome assay (Trumpower, 1987) and mass spectrometry. During purification, we  
263 consistently obtained both a large and small form; mass spectrometry of excised gel  
264 bands verified that these corresponded to 57 kDa and 41 kDa forms of PgcA, where the  
265 short form was truncated specifically at amino acid 127. This smaller variant was similar  
266 to the PgcA observed in evolved *G. sulfurreducens* KN400 strains overexpressing PgcA

267 (Tremblay et al., 2011), as well as the unidentified cytochrome previously recovered  
268 from *G. sulfurreducens* PCA supernatants (Lloyd et al., 1999).

269  
270 The visible spectrum of PgcA had an absorbance maximum at 405 nm in the oxidized  
271 state. The pyridine hemochrome assay extinction coefficient at 408 nm was  $137,000 \text{ M}^{-1}$   
272  $\text{cm}^{-1}$ , consistent with the incorporation of three hemes. PgcA was rapidly oxidized and  
273 reduced by ferricyanide and sodium dithionite, respectively. The reduced protein shifted  
274 to a maxima at 417 nm ( $\gamma$  or Soret), and demonstrated peaks at 518 nm ( $\beta$ ), 552 nm ( $\alpha$ ).  
275 No additional changes in the absorbance spectrum, such as those characteristic of His-  
276 Met coordination, were observed in these experiments (Figure 4A).

277  
278 Because of the significant amount of proline-rich repeats in PgcA, analyses of protein  
279 secondary structure was conducted using circular dichroism spectroscopy. Proline  
280 induced backbone rigidity can create unique secondary structures which alter regular  
281 alpha-helix/beta-sheet patterns, such as in the case of the collagen triplex helix. CD  
282 spectra were recorded in millidegrees (mdeg) from 200-240 nanometer wavelengths of  
283 fully oxidized, truncated (41 kDa) PgcA in pH 7.5 phosphate buffer with 100 mM sodium  
284 fluoride (Greenfield, 2007). No evidence of intrinsic disorder or unique secondary  
285 structures were detected in the experimental conditions (using K2D3). PgcA was  
286 composed of 70.5% alpha helical character and 5.2% beta-sheet character (Figure 4B),  
287 (Greenfield, 2007; Pellegrini, 2015). The alpha helix relative to beta sheet composition  
288 of PgcA was significantly more helical than the 10% alpha helix value estimated for  
289 OmcS (Qian et al., 2011) and the 13% value reported for OmcZ (Inoue et al., 2010), but  
290 is consistent with the alpha helical bias observed for other heme proteins (Smith et al.,  
291 2010).

292  
293 As some extracellular cytochromes (such as OmcS) show an affinity for binding Fe(III)  
294 oxides, PgcA was incubated with freshly prepared Fe(III) oxide, as well as biologically  
295 reduced magnetite at pH 6.5, where both of these minerals have a net positive charge  
296 (Kosmulski, 2011). Using absorbance at 410 nm to monitor soluble protein  
297 concentrations, PgcA showed an ability to bind the oxidized, but not reduced mineral.

298 After incubation with Fe(III), all PgcA added to solution was removed by the pelleting of  
299 metal oxide particles. In contrast, incubation with magnetite removed less than 10% of  
300 PgcA from solution, and magnetite also did not reduce PgcA, based on spectroscopy.  
301 When BSA or horse heart cytochrome *c* were incubated with Fe(III) oxide or magnetite,  
302 both proteins remained in the supernatant (>90%).

303

304 *Purified PgcA added extracellularly can accelerate Fe(III) reduction capabilities of*  
305  *$\Delta pgcA$  cells to wild type levels.* Purified PgcA was used to determine if PgcA added  
306 extracellularly could rescue the inability of  $\Delta pgcA$  inability to reduce Fe(III), or accelerate  
307 activity in the wild type. As a control in these experiments, purified PgcA was compared  
308 with a known electron shuttle, flavin mononucleotide, as well as proteins not expected to  
309 facilitate electron transfer (bovine serum albumin and horse heart *c*-type cytochrome)  
310 (Hartshorne et al., 2007; Kotloski and Gralnick, 2013; Shi et al., 2012). All cells were  
311 pre-grown to a state of electron acceptor limitation, washed and incubated with Fe(III)  
312 oxide and acetate, and the accumulation of Fe(II) monitored for 20 hours.

313

314 Under these conditions, wild type *G. sulfurreducens* produced 3.4 mM Fe(II), while the  
315  $\Delta pgcA$  mutant only produced 0.13 mM Fe(II) (Figure 5). When purified PgcA was  
316 added, rates of Fe(III) reduction doubled in the wild type, but increased nearly 20-fold in  
317 the *pgcA* mutant. Addition of horse heart *c*-type cytochrome or bovine serum albumin at  
318 similar concentration had no stimulatory effect on either culture.

319

320 When wild type cells were incubated with Fe(III) oxide and increasing amounts of flavin  
321 mononucleotide, rates of Fe(III) reduction improved until FMN concentrations reached  
322 50  $\mu$ M. Levels above 50  $\mu$ M produced similar levels of stimulation to the wild type.  
323 Addition of 50  $\mu$ M FMN accelerated metal reduction by the wild type cells similar to  
324 addition of PgcA, and stimulated reduction in  $\Delta pgcA$  more than added PgcA alone.  
325 When both FMN and PgcA were added to the *pgcA* mutant, the effects were additive,  
326 resulting in the highest observed levels of stimulation, over 40-fold faster than the  
327 mutant alone.

328

## 329 Discussion

330 The data presented here implicates a role for PgcA in electron transfer beyond the outer  
331 membrane, specifically during reduction of metal oxides compared to other acceptors  
332 such as electrodes or Fe(III) citrate. This role is consistent with studies correlating *pgcA*  
333 expression with Fe(III) oxide reduction, while the processing of PgcA explains repeated  
334 observations of a 41 kDa cytochrome in *Geobacter* supernatants. The protein has  
335 properties that support association with both cell surfaces and oxidized minerals, and in  
336 purified form, can be added extracellularly to rescue Fe(III) reduction by  $\Delta pgcA$  mutants.

337

338 While PgcA can be recovered from cell supernatants, and soluble PgcA added to cell  
339 suspensions will accelerate metal reduction, the question remains whether it exists to  
340 diffuse freely between cells and metals, or is retained by flexible extracellular materials  
341 to increase the probability of cell-metal contacts. The strongest evidence arguing  
342 against soluble shuttle-like compounds in *G. sulfurreducens* is derived from experiments  
343 where metals entrapped in alginate beads are not reduced by cells. However, such  
344 beads are estimated to exclude proteins larger than 12 kDa, restricting PgcA from the  
345 encased iron (Nevin and Lovley, 2000).

346

347 Another way to examine whether PgcA could act as a freely soluble shuttle is to  
348 estimate the possible cost. To secrete enough PgcA to achieve a concentration of 10  
349  $\mu\text{M}$  in the space extending 1  $\mu\text{m}$  in all directions from a cell 1  $\mu\text{m}$  in diameter (an  
350 extracellular volume of  $13.6 \mu\text{m}^3$ ) would require about  $6.8 \times 10^{-15}$  g protein. This would  
351 represent almost 7% of the  $1 \times 10^{-13}$  g protein in a *Geobacter* cell, a considerable cost  
352 (Figure 6). The high price of protein synthesis, combined with additional dilution of  
353 protein into the nearby environment, argues for mechanisms that keep proteins tethered  
354 to cells or functional at effective concentrations less than 1  $\mu\text{M}$ , where the burden is  
355 calculated to be below 1% of cell protein.

356

357 The repetitive domains within PgcA also raise questions about localization. Tandem  
358 repeat domains are commonly associated with adhesion and biomineralization in  
359 secreted proteins (Paladin and Tosatto, 2015). Ice nucleation and antifreeze proteins

360 contain simple TXT<sub>x</sub> amino acid sequences (Kobashigawa et al., 2005), while TPT<sub>x</sub>  
361 repeats of equal or greater length are found in secreted chitin binding, carbohydrate  
362 binding, and cellulose binding proteins. TPT<sub>x</sub> repeats also occur in viral proteins of  
363 unknown function, including; *Thermoproteus tenax* virus isolated from a “sulfotatic mud  
364 hole” (Katti et al., 2000) and the ATV virus from *Acidianus convivator* (Prangishvili et al.,  
365 2006). The only function attributed to such repeats is based on the phage display work  
366 of Lower (Lower et al., 2008), who found S/T-P-S/T sequences bound metal oxides  
367 such as hematite. Such repeats exist as putative metal binding sites in OmcA/MtrC-  
368 family cytochromes, and are proposed to aid silica binding by silaffins in the alga  
369 *Thalassiosira pseudonana*. Based on our finding that PgcA bound Fe(III) oxides but not  
370 magnetite, one possibility is that the TPT<sub>x</sub>-rich region helps deliver the protein to  
371 oxidized metals, yet releases proteins as acceptors become reduced.

372

373 As components of the *Geobacter* electron transfer chain are revealed, a general theme  
374 of redox protein specialization has emerged. Different inner membrane cytochromes are  
375 required for reduction of low potential vs. high potential acceptors (Levar et al., 2014;  
376 Zacharoff et al., 2015), while in *S. oneidensis*, one inner membrane cytochrome is used  
377 for a range of metals, organic compounds, and electrodes (Gralnick and Newman,  
378 2007; Marritt et al., 2012; Ross et al., 2011). Five outer membrane multiheme  
379 cytochrome conduits are functional in *G. sulfurreducens*, and only specific conduits and  
380 required for electrodes vs. Fe(III) and Mn(IV) oxides (Chan et al., 2017). In contrast,  
381 *Shewanella* uses only a single outer membrane complex for all acceptors (Gralnick and  
382 Newman, 2007). A similar diversity of secreted proteins with specific extracellular roles  
383 appears to be utilized by *G. sulfurreducens*, while no such secreted cytochromes have  
384 been found in *S. oneidensis*. One hypothesis is that the high reactivity and mobility of  
385 flavins produced by *S. oneidensis* act as a ‘universal translator’ between outer  
386 membrane cytochromes and minerals (Shi et al., 2012). In the absence of a redox-  
387 active shuttle, *Geobacter* may be forced to encode a wide assortment of secreted  
388 proteins such as PgcA to ensure direct electron transfer under all conditions.

389

390



391 **Acknowledgments**

392 The Biophysical Resource Center at the University of Minnesota provided vital time and  
393 training on the JASCO-J815 circular dichroism spectropolarimeter. This study was  
394 supported by grant N000141612194 from the Office of Naval Research.

395

396 **References**

- 397 Aklujkar, M., Coppi, M. V, Leang, C., Kim, B. C., Chavan, M. A., Perpetua, L. a, et al.  
398 (2013). Proteins involved in electron transfer to Fe(III) and Mn(IV) oxides by  
399 *Geobacter sulfurreducens* and *Geobacter uraniireducens*. *Microbiology* 159, 515–  
400 35. doi:10.1099/mic.0.064089-0.
- 401 Byrne, J. M., Telling, N. D., Coker, V. S., Patrick, R. A D., van der Laan, G., Arenholz,  
402 E., et al. (2011). Control of nanoparticle size, reactivity and magnetic properties  
403 during the bioproduction of magnetite by *Geobacter sulfurreducens*.  
404 *Nanotechnology* 22, 455709. doi:10.1088/0957-4484/22/45/455709.
- 405 Chan, C. H., Levar, C. E., Jimenez-Otero, F., and Bond, D. R. (2017). Genome scale  
406 mutational analysis of *Geobacter sulfurreducens* reveals distinct molecular  
407 mechanisms for respiration and sensing of poised electrodes vs Fe(III) oxides. *J.*  
408 *Bacteriol.* doi:10.1128/JB.00340-17.
- 409 Chan, C. H., Levar, C. E., Zacharoff, L., Badalamenti, J. P., and Bond, D. R. (2015).  
410 Scarless genome editing and stable inducible expression vectors for *Geobacter*  
411 *sulfurreducens*. *Appl. Environ. Microbiol.* 81, 7178–7186. doi:10.1128/AEM.01967-  
412 15.
- 413 Coker, V. S., Byrne, J. M., Telling, N. D., van der Laan, G., and Lloyd, J. R. (2012).  
414 Characterisation of the dissimilatory reduction of Fe (III)-oxyhydroxide at the  
415 microbe – mineral interface□: the application of STXM – XMCD. 347–354.  
416 doi:10.1111/j.1472-4669.2012.00329.x.
- 417 Crooks G. E., Hon G., Chandonia J. M., Brenner, S. E. (2004) WebLogo: A sequence  
418 logo generator. *Genome Research*, 14:1188-1190, (2004)
- 419 Cutting, R. S., Coker, V. S., Fellowes, J. W., Lloyd, J. R., and Vaughan, D. J. (2009).  
420 Mineralogical and morphological constraints on the reduction of Fe (III) minerals by  
421 *Geobacter sulfurreducens*. *Geochim. Cosmochim. Acta* 73, 4004–4022.



- 422 doi:10.1016/j.gca.2009.04.009.
- 423 Ding, Y.-H. R., Hixson, K. K., Aklujkar, M. A, Lipton, M. S., Smith, R. D., Lovley, D. R.,  
424 et al. (2008). Proteome of *Geobacter sulfurreducens* grown with Fe(III) oxide or  
425 Fe(III) citrate as the electron acceptor. *Biochim. Biophys. Acta* 1784, 1935–41.  
426 doi:10.1016/j.bbapap.2008.06.011.
- 427 Ding, Y.-H. R., Hixson, K. K., Giometti, C. S., Stanley, A., Esteve-Núñez, A., Khare, T.,  
428 et al. (2006). The proteome of dissimilatory metal-reducing microorganism  
429 *Geobacter sulfurreducens* under various growth conditions. *Biochim. Biophys. Acta*  
430 1764, 1198–206. doi:10.1016/j.bbapap.2006.04.017.
- 431 Edwards, M. J., Hall, A., Shi, L., Fredrickson, J. K., Zachara, J. M., Butt, J. N., et al.  
432 (2012). The crystal structure of the extracellular 11-heme cytochrome UndA reveals  
433 a conserved 10-heme motif and defined binding site for soluble iron chelates.  
434 *Structure* 20, 1275–84. doi:10.1016/j.str.2012.04.016.
- 435 Gralnick, J. a, and Newman, D. K. (2007). Extracellular respiration. *Mol. Microbiol.* 65,  
436 1–11. doi:10.1111/j.1365-2958.2007.05778.x.
- 437 Greenfield, N. J. (2007). Using circular dichroism spectra to estimate protein secondary  
438 structure. *Nature Protocols*. doi:10.1038/nprot.2006.202.
- 439 Hartshorne, R. S., Jepsen, B. N., Clarke, T. a, Field, S. J., Fredrickson, J., Zachara, J.,  
440 et al. (2007). Characterization of *Shewanella oneidensis* MtrC: a cell-surface  
441 decaheme cytochrome involved in respiratory electron transport to extracellular  
442 electron acceptors. *J. Biol. Inorg. Chem.* 12, 1083–94. doi:10.1007/s00775-007-  
443 0278-y.
- 444 Inoue, K., Leang, C., Franks, A. E., Woodard, T. L., Nevin, K. P., and Lovley, D. R.  
445 (2011). Specific localization of the c-type cytochrome OmcZ at the anode surface in  
446 current-producing biofilms of *Geobacter sulfurreducens*. *Environ. Microbiol. Rep.* 3,  
447 211–217. doi:10.1111/j.1758-2229.2010.00210.x.
- 448 Inoue, K., Qian, X., Morgado, L., Kim, B.-C., Mester, T., Izallalen, M., et al. (2010).  
449 Purification and characterization of OmcZ, an outer-surface, octaheme c-type  
450 cytochrome essential for optimal current production by *Geobacter sulfurreducens*.  
451 *Appl. Environ. Microbiol.* 76, 3999–4007. doi:10.1128/AEM.00027-10.
- 452 Katti, M. V, Sami-Subbu, R., Ranjekar, P. K., and Gupta, V. S. (2000). Amino acid

453 repeat patterns in protein sequences: their diversity and structural-functional  
454 implications. *Protein Sci.* 9, 1203–1209. doi:10.1110/ps.9.6.1203.

455 Kellenberger, C. a., Wilson, S. C., Hickey, S. F., Gonzalez, T. L., Su, Y., Hallberg, Z. F.,  
456 et al. (2015). GEMM-I riboswitches from *Geobacter* sense the bacterial second  
457 messenger cyclic AMP-GMP. *Proc. Natl. Acad. Sci.*, 201419328.  
458 doi:10.1073/pnas.1419328112.

459 Klimes, A., Franks, A. E., Glaven, R. H., Tran, H., Barrett, C. L., Qiu, Y., et al. (2010).  
460 Production of pilus-like filaments in *Geobacter sulfurreducens* in the absence of the  
461 type IV pilin protein PilA. *FEMS Microbiol. Lett.* 310, 62–68. doi:10.1111/j.1574-  
462 6968.2010.02046.x.

463 Kobashigawa, Y., Nishimiya, Y., Miura, K., Ohgiya, S., Miura, A., and Tsuda, S. (2005).  
464 A part of ice nucleation protein exhibits the ice-binding ability. *FEBS Lett.* 579,  
465 1493–1497. doi:10.1016/j.febslet.2005.01.056.

466 Kosmulski, M. (2011). The pH-dependent surface charging and points of zero charge V.  
467 Update. *J. Colloid Interface Sci.* 353, 1–15. doi:10.1016/j.jcis.2010.08.023.

468 Kotloski, N. J., and Gralnick, J. A. (2013). Flavin electron shuttles dominate extracellular  
469 electron transfer by *Shewanella oneidensis*. *MBio* 4, 10–13.  
470 doi:10.1128/mBio.00553-12.

471 Leang, C., Qian, X., Mester, T., and Lovley, D. R. (2010). Alignment of the c-type  
472 cytochrome OmcS along pili of *Geobacter sulfurreducens*. *Appl. Environ. Microbiol.*  
473 76, 4080–4. doi:10.1128/AEM.00023-10.

474 Levar, C. E., Chan, C. H., Mehta-kolte, M. G., and Bond, D. R. (2014). An inner  
475 membrane cytochrome required only for reduction of high redox potential  
476 extracellular electron acceptors. *MBio* 5, 1–9. doi:10.1128/mBio.02034-14.

477 Lies, D. P., Mielke, R. E., Gralnick, J. A., and Newman, D. K. (2005). *Shewanella*  
478 *oneidensis* MR-1 uses overlapping pathways for iron reduction at a distance and by  
479 direct contact under conditions relevant for biofilms. *Appl. Environ. Microbiol.* 71,  
480 4414–4426. doi:10.1128/AEM.71.8.4414.

481 Lloyd, J. R., Blunt-Harris, E. L., and Lovley, D. R. (1999). The periplasmic 9.6-kilodalton  
482 c-type cytochrome of *Geobacter sulfurreducens* is not an electron shuttle to Fe(III).  
483 *J. Bacteriol.* 181, 7647–7649.

- 484 Lower, L., Lins, R. D., Oestreicher, Z., Straatsma, T. P., Hochella Jr., M., Shi, L., et al.  
485 (2008). In vitro evolution of a peptide with a hematite binding motif that may  
486 constitute a natural metal-oxide binding archetype. *Environ. Sci. Technol.* 42,  
487 3821–3827.
- 488 Majzlan, J. (2012). *Minerals and aqueous species of iron and manganese as reactants*  
489 *and products of microbial metal respiration*. in Microbial metal respiration; from  
490 geochemistry to potential applications. 1<sup>st</sup> ed. J. Gescher and A. Kappler. Springer  
491 Verlag, New York, NY.
- 492 Marritt, S. J., McMillan, D. G. G., Shi, L., Fredrickson, J. K., Zachara, J. M., Richardson,  
493 D. J., et al. (2012). The roles of CymA in support of the respiratory flexibility of  
494 *Shewanella oneidensis* MR-1. *Biochem. Soc. Trans.* 40, 1217–21.  
495 doi:10.1042/BST20120150.
- 496 Marsili, E., Baron, D. B., Shikhare, I. D., Coursolle, D., Gralnick, J. A., and Bond, D. R.  
497 (2008). *Shewanella* secretes flavins that mediate extracellular electron transfer.  
498 *Proc. Natl. Acad. Sci. U. S. A.* 105, 3968–73. doi:10.1073/pnas.0710525105.
- 499 Mehta-Kolte, M. G., and Bond, D. R. (2012). *Geothrix fermentans* secretes two different  
500 redox-active compounds to utilize electron acceptors across a wide range of redox  
501 potentials. *Appl. Environ. Microbiol.* 78, 6987–95. doi:10.1128/AEM.01460-12.
- 502 Mehta, T., Coppi, M. V, Childers, S. E., and Lovley, D. R. (2005). Outer membrane c-  
503 type cytochromes required for Fe(III) and Mn(IV) oxide reduction in *Geobacter*  
504 *sulfurreducens*. *Appl. Environ. Microbiol.* 71, 8634–8641.  
505 doi:10.1128/AEM.71.12.8634-8641.2005.
- 506 Nealson, K. H., and Saffarini, D. (1994). Iron and manganese in anaerobic respiration:  
507 environmental significance, physiology, and regulation. *Annu. Rev. Microbiol.* 48,  
508 311–343. doi:10.1146/annurev.mi.48.100194.001523.
- 509 Nelson, J. W., Sudarsan, N., Phillips, G. E., Stav, S., Lünse, C. E., McCown, P. J., et al.  
510 (2015). Control of bacterial exoelectrogenesis by c-AMP-GMP. *Proc. Natl. Acad.*  
511 *Sci.*, 201419264. doi:10.1073/pnas.1419264112.
- 512 Neumann, H., and Zillig, W. (1990a). Structural variability in the genome of the  
513 *Thermoproteus tenax* virus TTV1. *Mol. Gen. Genet.* 222, 435–437.  
514 doi:10.1007/BF00633851.

- 515 Neumann, H., and Zillig, W. (1990b). The TTV1-encoded viral protein TPX□: primary  
516 structure of the gene and the protein. *Nucleic Acids Research*. 18, 1990.
- 517 Nevin, K. P., Kim, B.-C., Glaven, R. H., Johnson, J. P., Woodard, T. L., Methé, B. A., et  
518 al. (2009). Anode biofilm transcriptomics reveals outer surface components  
519 essential for high density current production in *Geobacter sulfurreducens* fuel cells.  
520 *PLoS One* 4, e5628. doi:10.1371/journal.pone.0005628.
- 521 Nevin, K. P., and Lovley, D. R. (2000). Lack of production of electron-shuttling  
522 compounds or solubilization of Fe(III) during reduction of insoluble Fe(III) oxide by  
523 *Geobacter metallireducens*. *Appl. Environ. Microbiol.* 66, 2248–2251.
- 524 Nevin, K. P., and Lovley, D. R. (2002). Mechanisms for accessing insoluble Fe(III) oxide  
525 during dissimilatory Fe(III) reduction by *Geothrix fermentans*. *Appl. Environ.*  
526 *Microbiol.* 68, 2294–2299.
- 527 Paladin, L., and Tosatto, S. C. E. (2015). Comparison of protein repeat classifications  
528 based on structure and sequence families. *Biochemical Soc. Transactions*. 43,  
529 832–837. doi:10.1042/BST20150079.
- 530 Pellegrini, M. (2015). Tandem Repeats in Proteins: Prediction Algorithms and Biological  
531 Role. *Front. Bioeng. Biotechnol.* 3, 143. doi:10.3389/fbioe.2015.00143.
- 532 Pellegrini, M., Renda, M. E., and Vecchio, A. (2012). Ab initio detection of fuzzy amino  
533 acid tandem repeats in protein sequences. *BMC Bioinformatics* 13, S8.  
534 doi:10.1186/1471-2105-13-S3-S8.
- 535 Prangishvili, D., Vestergaard, G., Häring, M., Aramayo, R., Basta, T., Rachel, R., et al.  
536 (2006). Structural and genomic properties of the hyperthermophilic archaeal virus  
537 ATV with an extracellular stage of the reproductive cycle. *J. Mol. Biol.* 359, 1203–  
538 1216. doi:10.1016/j.jmb.2006.04.027.
- 539 Qian, X., Mester, T., Morgado, L., Arakawa, T., Sharma, M. L., Inoue, K., et al. (2011).  
540 Biochemical characterization of purified OmcS, a c-type cytochrome required for  
541 insoluble Fe(III) reduction in *Geobacter sulfurreducens*. *Biochim. Biophys. Acta*  
542 1807, 404–412. doi:10.1016/j.bbabi.2011.01.003.
- 543 Reguera, G., McCarthy, K. D., Mehta, T., Nicoll, J. S., Tuominen, M. T., and Lovley, D.  
544 R. (2005). Extracellular electron transfer via microbial nanowires. *Nature* 435,  
545 1098–1101. doi:10.1038/nature03661.

- 546 Rollefson, J. B., Levar, C. E., and Bond, D. R. (2009). Identification of genes involved in  
547 biofilm formation and respiration via mini-Himar transposon mutagenesis of  
548 *Geobacter sulfurreducens*. *J. Bacteriol.* 191, 4207–4217. doi:10.1128/JB.00057-09.
- 549 Rollefson, J. B., Stephen, C. S., Tien, M., and Bond, D. R. (2011). Identification of an  
550 extracellular polysaccharide network essential for cytochrome anchoring and  
551 biofilm formation in *Geobacter sulfurreducens*. *J. Bacteriol.* 193, 1023–33.  
552 doi:10.1128/JB.01092-10.
- 553 Ross, D. E., Flynn, J. M., Baron, D. B., Gralnick, J. A., and Bond, D. R. (2011). Towards  
554 Electrosynthesis in *Shewanella*: energetics of reversing the Mtr pathway for  
555 reductive metabolism. *PLOS One*. 6. doi:10.1371/journal.pone.0016649.
- 556 Shi, Z., Zachara, J. M., Shi, L., Wang, Z., Moore, D. A., Kennedy, D. W., et al. (2012).  
557 Redox reactions of reduced flavin mononucleotide (FMN), riboflavin (RBF), and  
558 anthraquinone-2,6-disulfonate (AQDS) with ferrihydrite and lepidocrocite. *Environ.*  
559 *Sci. Technol.* 46, 11644–11652.
- 560 Smith, J. A., Aklujkar, M., Risso, C., Leang, C., Giloteaux, L., and Holmes, D. E. (2015).  
561 Mechanisms involved in Fe(III) respiration by the hyperthermophilic archaeon  
562 *Ferroglobus placidus*. *Appl. Environ. Microbiol.* 81, 2735–2744.  
563 doi:10.1128/AEM.04038-14.
- 564 Smith, J., Tremblay, P.-L., Shrestha, P. M., Snoeyenbos-West, O. L., Franks, A. E.,  
565 Nevin, K. P., et al. (2014). Going wireless: Fe(III) oxide reduction without pili by  
566 *Geobacter sulfurreducens* strain JS-1. *Appl. Environ. Microbiol.* 80, 4331–40.  
567 doi:10.1128/AEM.01122-14.
- 568 Smith, L. J., Kahraman, A., and Thornton, J. M. (2010). Heme proteins--diversity in  
569 structural characteristics, function, and folding. *Proteins* 78, 2349–68.  
570 doi:10.1002/prot.22747.
- 571 Tan, Y., Adhikari, R. Y., Malvankar, N. S., Ward, J. E., Nevin, K. P., Woodard, T. L., et  
572 al. (2016). The Low conductivity of *Geobacter uraniireducens* pili mechanisms in  
573 the genus *Geobacter*. *Front. Microbiol.* 7, 1–10. doi:10.3389/fmicb.2016.00980.
- 574 Thomas, P. E., Ryan, D., and Levin, W. (1976). An improved staining procedure for the  
575 detection of the peroxidase activity of cytochrome P-450 on sodium dodecyl sulfate  
576 polyacrylamide gels. *Analytical Biochemistry.* 75, 168–76.

- 577 Tremblay, P.-L., Summers, Z. M., Glaven, R. H., Nevin, K. P., Zengler, K., Barrett, C. L.,  
578 et al. (2011). A c-type cytochrome and a transcriptional regulator responsible for  
579 enhanced extracellular electron transfer in *Geobacter sulfurreducens* revealed by  
580 adaptive evolution. *Environ. Microbiol.* 13, 13–23. doi:10.1111/j.1462-  
581 2920.2010.02302.x.
- 582 Berry, E., Trumpower, B. (1987). Simultaneous determination of hemes a, b, and c from  
583 pyridine hemochrome spectra. *Analytical Biochemistry.* 161, 1-15.
- 584 Von Canstein, H., Ogawa, J., Shimizu, S., and Lloyd, J. R. (2008). Secretion of flavins  
585 by *Shewanella* species and their role in extracellular electron transfer. *Appl.*  
586 *Environ. Microbiol.* 74, 615–623. doi:10.1128/AEM.01387-07.
- 587 Yi, H., Nevin, K. P., Kim, B.-C., Franks, A. E., Klimes, A., Tender, L. M., et al. (2009).  
588 Selection of a variant of *Geobacter sulfurreducens* with enhanced capacity for  
589 current production in microbial fuel cells. *Biosens. Bioelectron.* 24, 3498–503.  
590 doi:10.1016/j.bios.2009.05.004.
- 591 Zacharoff, L., Chan, C. H., and Bond, D. R. (2016). Reduction of low potential electron  
592 acceptors requires the CbcL inner membrane cytochrome of *Geobacter*  
593 *sulfurreducens*. *Bioelectrochemistry.* 107, 7-13.  
594 doi:10.1016/j.bioelechem.2015.08.003.  
595



596 **Figure Legends**

597

598 **Figure 1. Characteristics of PgcA amino acid sequences.** A. The full length protein  
599 includes a sec-secretion domain, lipid attachment domain (green), cleavage site  
600 identified by LC/MS, repetitive TPT<sub>x</sub> domains (blue) and three CXXCH c- type  
601 cytochrome binding motifs (red). The tandem repeat of the PT<sub>x</sub>-CXXCH domain is  
602 highlighted. B. Conservation of repetitive TPT<sub>x</sub> or APA<sub>x</sub> pattern between heme domains  
603 in alignments of 13 homologs to PgcA. C. Other examples of repetitive domains  
604 identified by PTRStalker within putative secreted cytochromes of related strains.  
605

606 **Figure 2. *G. sulfurreducens* mutants lacking *pgcA* are defective in reduction of**  
607 **insoluble Fe(III), but reduce soluble Fe(III) similar to wild type.** A. Fe(III) citrate  
608 reduction by wild type carrying empty vector,  $\Delta pgcA$  carrying empty vector, and  $\Delta pgcA$   
609 carrying the vector expressing *pgcA* from a constitutive promoter. B. Fe(III) oxide  
610 reduction by wild type carrying empty vector,  $\Delta pgcA$  carrying empty vector, and  $\Delta pgcA$   
611 carrying the vector expressing *pgcA*. Error bars are +/- standard deviation of four  
612 replicates.

613

614 **Figure 3. Deletion of *pgcA* does not affect growth of *G. sulfurreducens* on**  
615 **graphite electrodes.** A. Working electrodes were poised at +0.24 mV vs. SHE, and  
616 current density, *j*, is expressed as  $\mu A/cm^2$  for wild type and  $\Delta pgcA$  cells. B. Cyclic  
617 voltammetry of wild type cells compared to  $\Delta pgcA$  mutants after 80 h of growth.

618

619 **Figure 4. Biochemical characterization of *G. sulfurreducens* PgcA expressed in**  
620 ***Shewanella oneidensis*.** Oxidized and reduced electronic absorption spectroscopy in  
621 the visible region. B. Circular dichroism of PgcA, using the 41 kDa processed form,  
622 modeled spectrum generated from K2D3 program. C. Spectroscopy of solutions after  
623 incubation and centrifugation of PgcA with oxidized Fe(III) oxide (dotted line) vs.  
624 magnetite (grey line).

625

626 **Figure 5. PgcA added to cell suspensions accelerates Fe(III) reduction.** A. Washed  
627 wild type cells were incubated with Fe(III) oxide and acetate for 20 h. Cells were



628 provided with 12 $\mu$ M PgcA, 50 $\mu$ M flavin mononucleotide (FMN), or both PgcA and FMN.  
629 B. Washed  $\Delta$ pgcA cells incubated with Fe(III) oxide, 12 $\mu$ M PgcA, 50 $\mu$ M flavin  
630 mononucleotide (FMN), or both PgcA and FMN. Standard deviations are +/- 3  
631 independent replicates.

632

633 **Figure 6. Calculated protein burden of using PgcA as a soluble shuttle across a**  
634 **range of concentrations and distances.** A. The amount of a 50 kDa protein required  
635 to reach a given concentration in a given volume was calculated in grams, and  
636 expressed as a fraction of a standard  $1 \times 10^{-13}$  g *Geobacter* cell. B. Visualization of the  
637 volume around a cell needing to be filled; For simplicity calculations are based on a  
638 sphere extending from the cell membrane. A volume 1  $\mu$ m in all directions is 13.6  $\mu$ m<sup>3</sup>,  
639 while the volume 2  $\mu$ m from a cell is 65  $\mu$ m<sup>3</sup>. This exponential increase with distance  
640 rapidly increases the burden of a protein-based shuttling strategy.

641

642

643

644

645

646

647

648

649

650

651

652

653

654 **Tables**

655 **Table 1 Strains used in this study**

| <b>Strain or Plasmid</b>                      | <b>Description</b>                                                                                          | <b>Source/Reference</b>  |
|-----------------------------------------------|-------------------------------------------------------------------------------------------------------------|--------------------------|
| Strains                                       |                                                                                                             |                          |
| <i>G. sulfurreducens</i> PCA                  | Wild Type (ATCC 51573)                                                                                      | Lab collection           |
| $\Delta$ <i>pgcA</i> <i>G. sulfurreducens</i> | Markerless deletion of <i>pgcA</i> gene in Wild Type <i>G. sulfurreducens</i> background                    | This study               |
| <i>E. coli</i> S17-1                          | Donor strain for conjugation                                                                                | Simon, 1983              |
| <i>Shewanella oneidensis</i>                  | Wild Type                                                                                                   | Myers and Nealson, 1988  |
| Plasmids                                      |                                                                                                             |                          |
| pK18mobsacB                                   | Markerless deletion vector                                                                                  | Schafer, 1994            |
| pRK2-Geo2                                     | Vector control and backbone for complementation vector                                                      | Chan et al., 2015        |
| <i>ppgcA</i>                                  | Complementation vector with constitutive expression of <i>pgcA</i> . <i>pgcA</i> was cloned into pRK2-Geo2. | This study               |
| pBAD202/D-TOPO®                               | Arabinose inducible expression vector backbone                                                              | Thermo Fisher Scientific |
| pBAD202PgcA                                   | Arabinose inducible expression vector containing PgcA                                                       | This study               |

656

## Figure 1

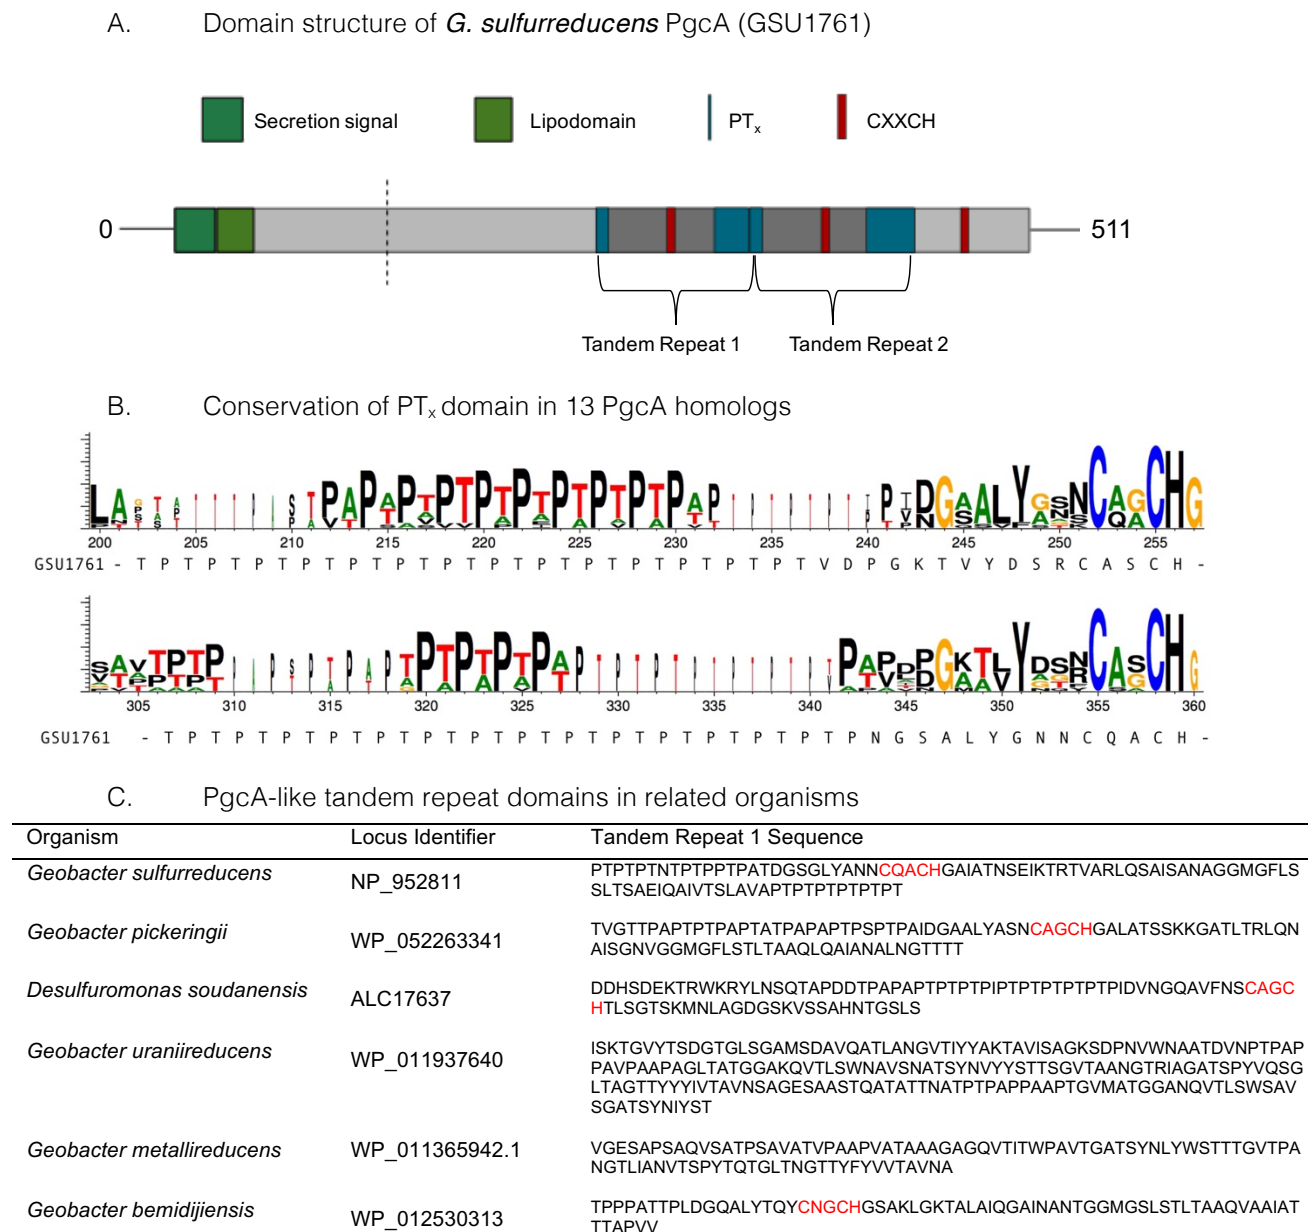

**Figure 1.** Characteristics of PgcA amino acid sequences. A. The full length protein includes a sec-secretion domain, lipid attachment domain (green), cleavage site identified by LC/MS, repetitive TPT<sub>x</sub> domains (blue) and three CXXCH c-type cytochrome binding motifs (red). The tandem repeat of the PT<sub>x</sub>-CXXCH domain is highlighted. B. Conservation of repetitive TPT<sub>x</sub> or APA<sub>x</sub> pattern between heme domains in alignments of 13 homologs to PgcA. C. Other examples of repetitive domains identified by PTRStalker within putative secreted cytochromes of related strains.

## Figure 2

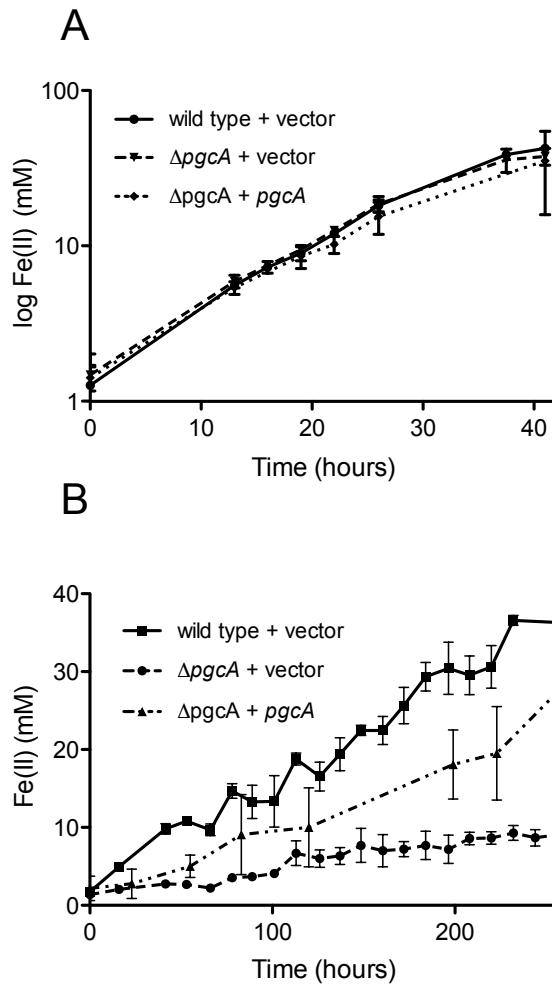

**Figure 2. *G. sulfurreducens* mutants lacking *pgcA* are defective in reduction of insoluble Fe(III), but reduce soluble Fe(III) similar to wild type.** A. Fe(III) citrate reduction by wild type carrying empty vector,  $\Delta pgcA$  carrying empty vector, and  $\Delta pgcA$  carrying the vector expressing *pgcA* from a constitutive promoter. B. Fe(III) oxide reduction by wild type carrying empty vector,  $\Delta pgcA$  carrying empty vector, and  $\Delta pgcA$  carrying the vector expressing *pgcA*. Error bars are +/- standard deviation of four replicates.

## Figure 3

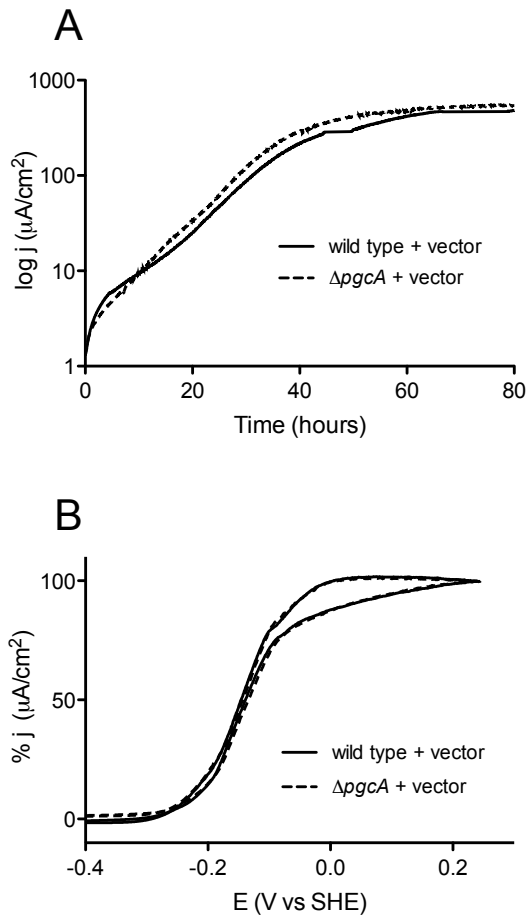

**Figure 3. Deletion of *pgcA* does not affect growth of *G. sulfurreducens* on graphite electrodes.** A. Working electrodes were poised at +0.24 mV vs. SHE, and current density,  $j$ , is expressed as  $\mu\text{A}/\text{cm}^2$  for wild type and  $\Delta pgcA$  cells. B. Cyclic voltammetry of wild type cells compared to  $pgcA$  mutants after 80 h of growth.

## Figure 4

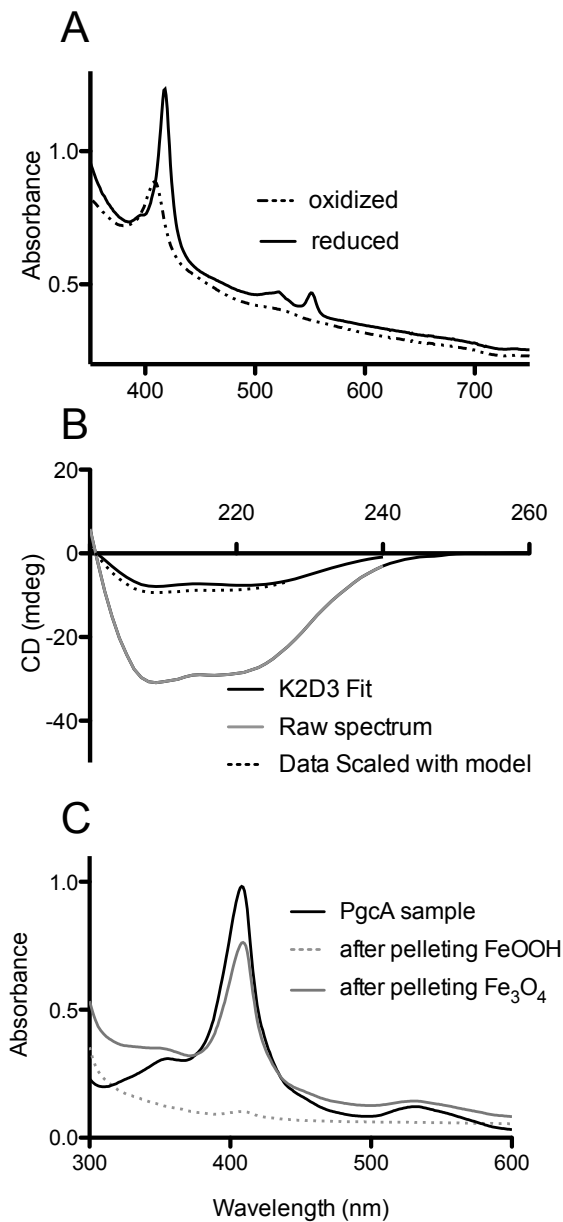

**Figure 4. Biochemical characterization of *G. sulfurreducens* PgcA expressed in *Shewanella oneidensis*.** Oxidized and reduced electronic absorption spectroscopy in the visible region. B. Circular dichroism of PgcA, using the 41 kDa processed form, modeled spectrum generated from K2D3 program. C. Spectroscopy of solutions after incubation and centrifugation of PgcA with oxidized Fe(III) oxide (dotted line) vs. magnetite (grey line).

## Figure 5

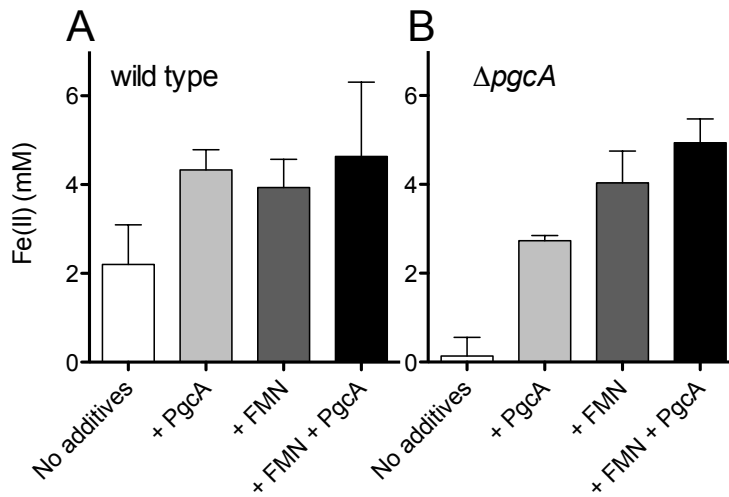

**Figure 5. PgcA added to cell suspensions accelerates Fe(III) reduction. A.** Washed wild type cells were incubated with Fe(III) oxide and acetate for 20 h. Cells were provided with 12 $\mu$ M PgcA, 50 $\mu$ M flavin mononucleotide (FMN), or both PgcA and FMN. B. Washed *pgcA* cells incubated with Fe(III) oxide, 12 $\mu$ M PgcA, 50 $\mu$ M flavin mononucleotide (FMN), or both PgcA and FMN. Standard deviations are +/- 3 independent replicates.



Figure 6

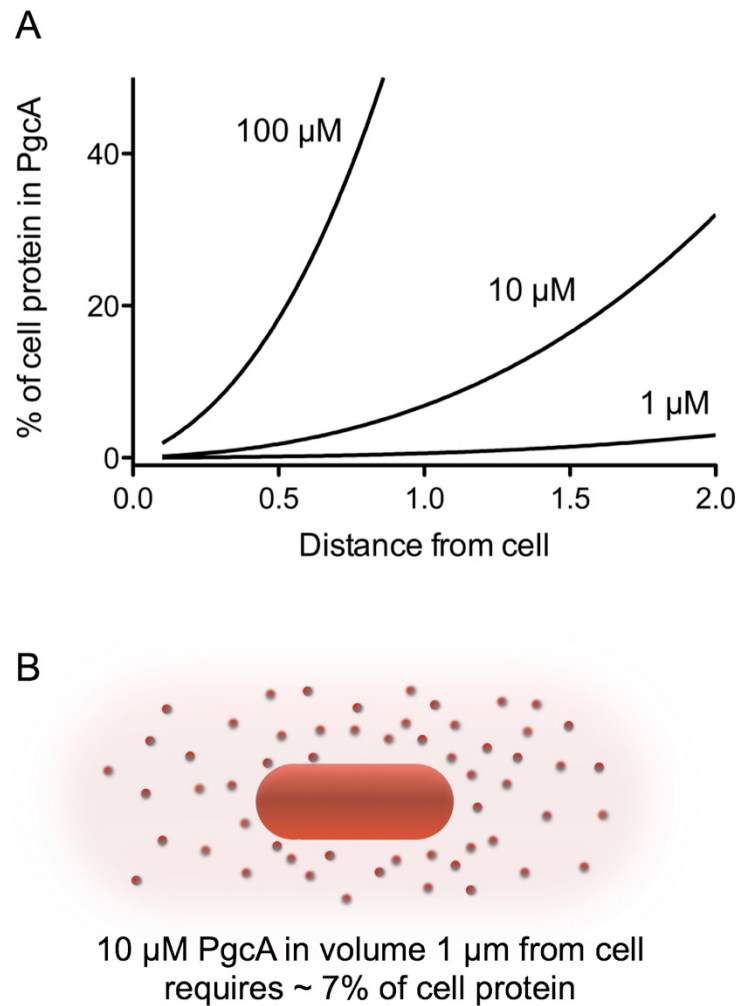

**Figure 6. Calculated protein burden of using PgcA as a soluble shuttle across a range of concentrations and distances.** A. The amount of a 50 kDa protein required to reach a given concentration in a given volume was calculated in grams, and expressed as a fraction of a standard  $1 \times 10^{-13}$  g *Geobacter* cell. B. Visualization of the volume around a cell needing to be filled; For simplicity calculations are based on a sphere extending from the cell membrane. A volume 1  $\mu\text{m}$  in all directions is  $13.6 \mu\text{m}^3$ , while the volume 2  $\mu\text{m}$  from a cell is  $65 \mu\text{m}^3$ . This exponential increase with distance rapidly increased the burden of a protein-based shuttling strategy.
